# Supplementary material for: Don’t Follow the Smoke—Listening to the Tobacco Experiences and Attitudes of Urban Aboriginal Adolescents in the Study of Environment on Aboriginal Resilience and Child Health (SEARCH)
Source: MDPI journal article supplement (doi:10.3390/ijerph20054587), 2023-03-04
Supplement: s1 [file s1]

# Physical, Social & Emotional Wellbeing

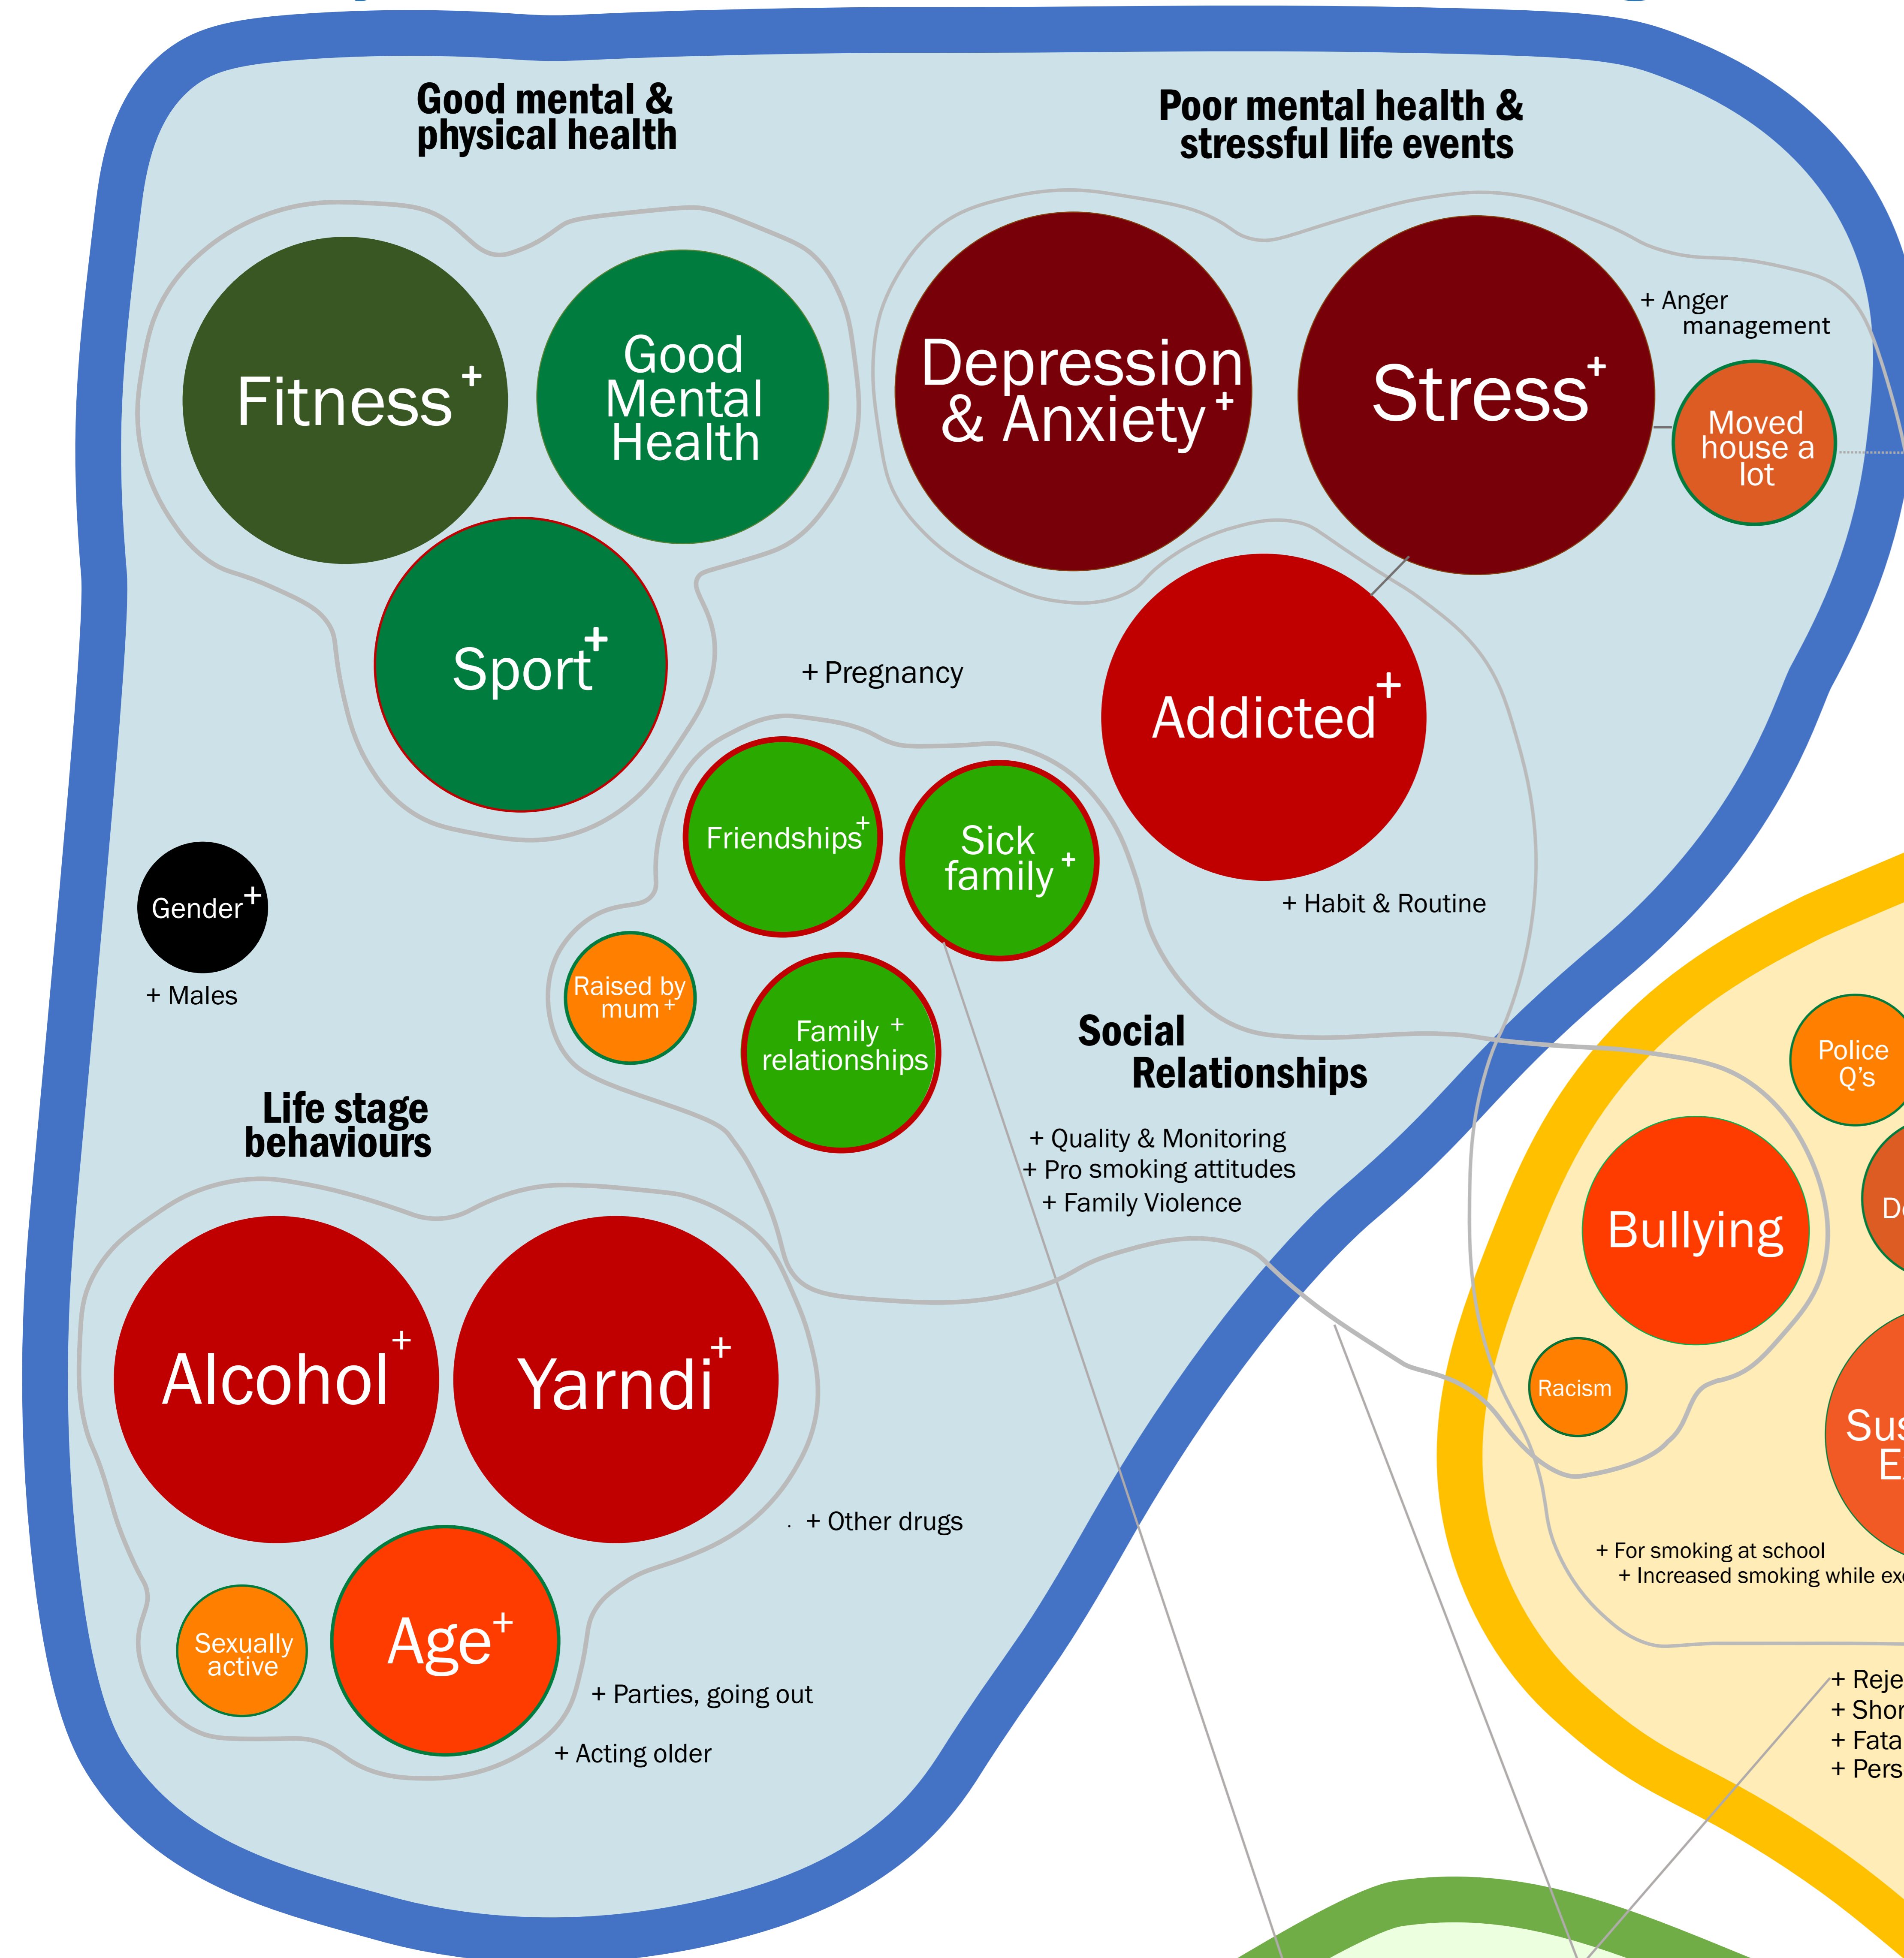

# Cultural & Community Strengths

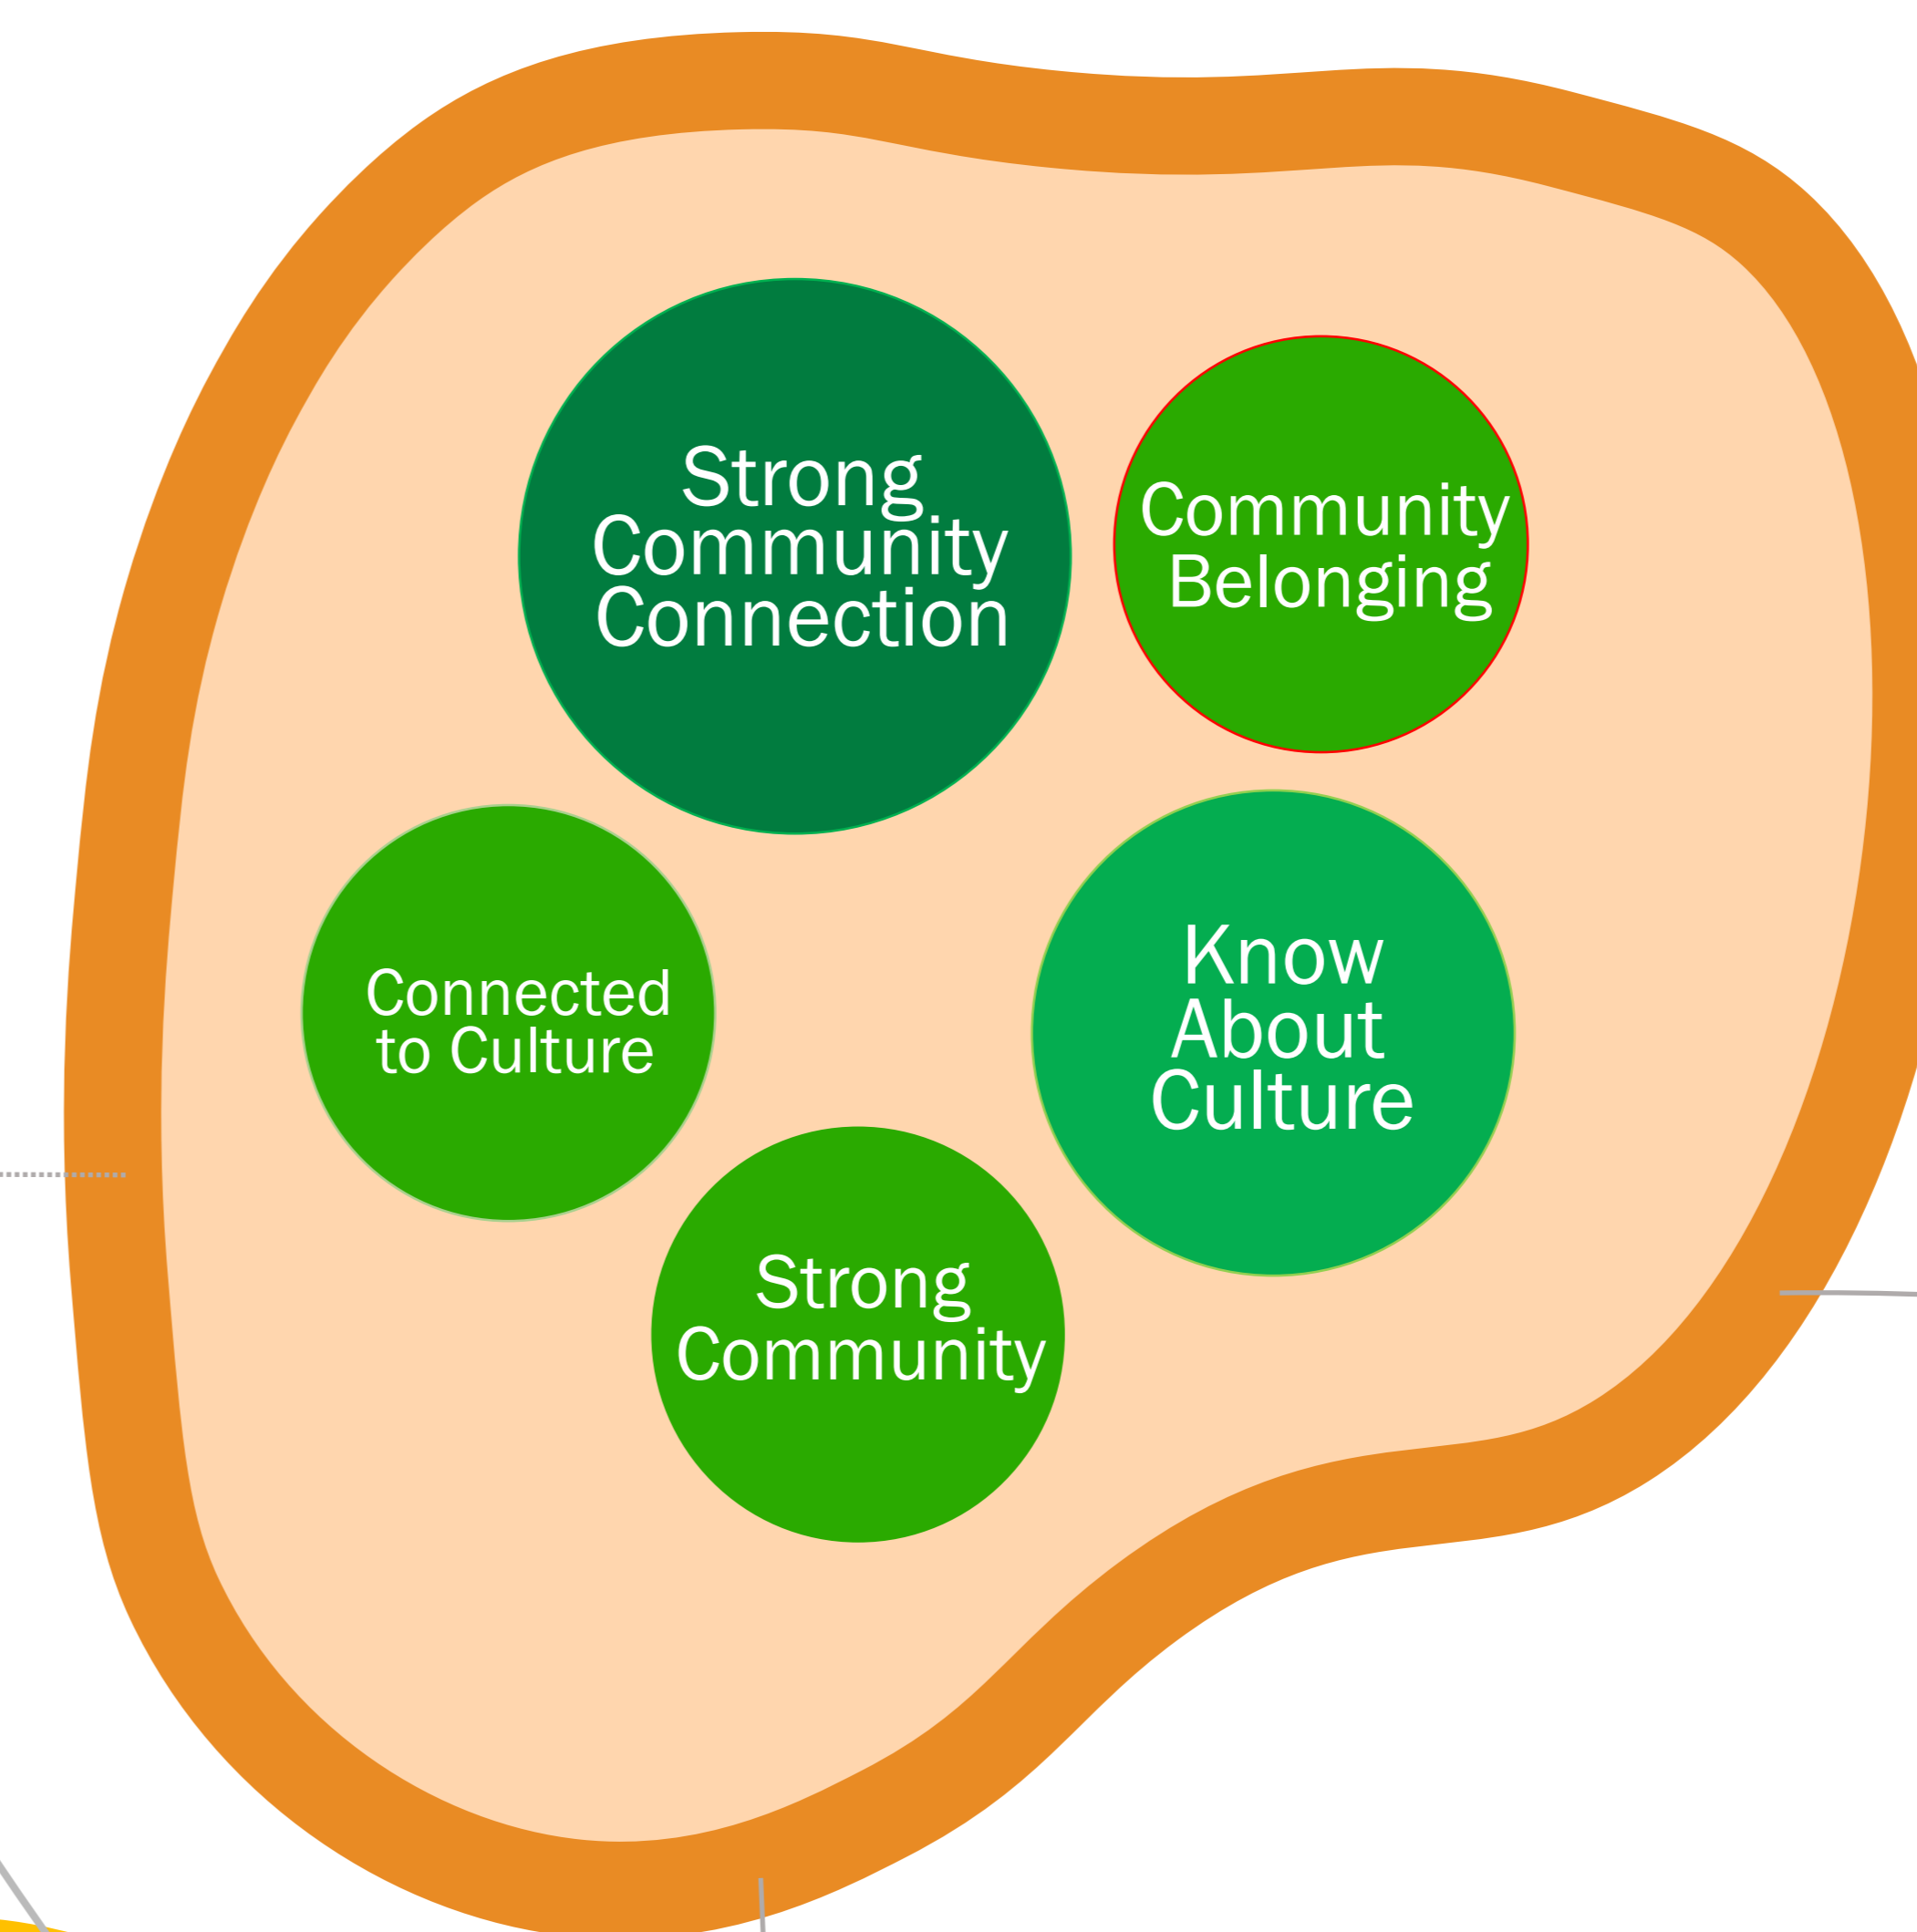

# Individual Empowerment & Engagement

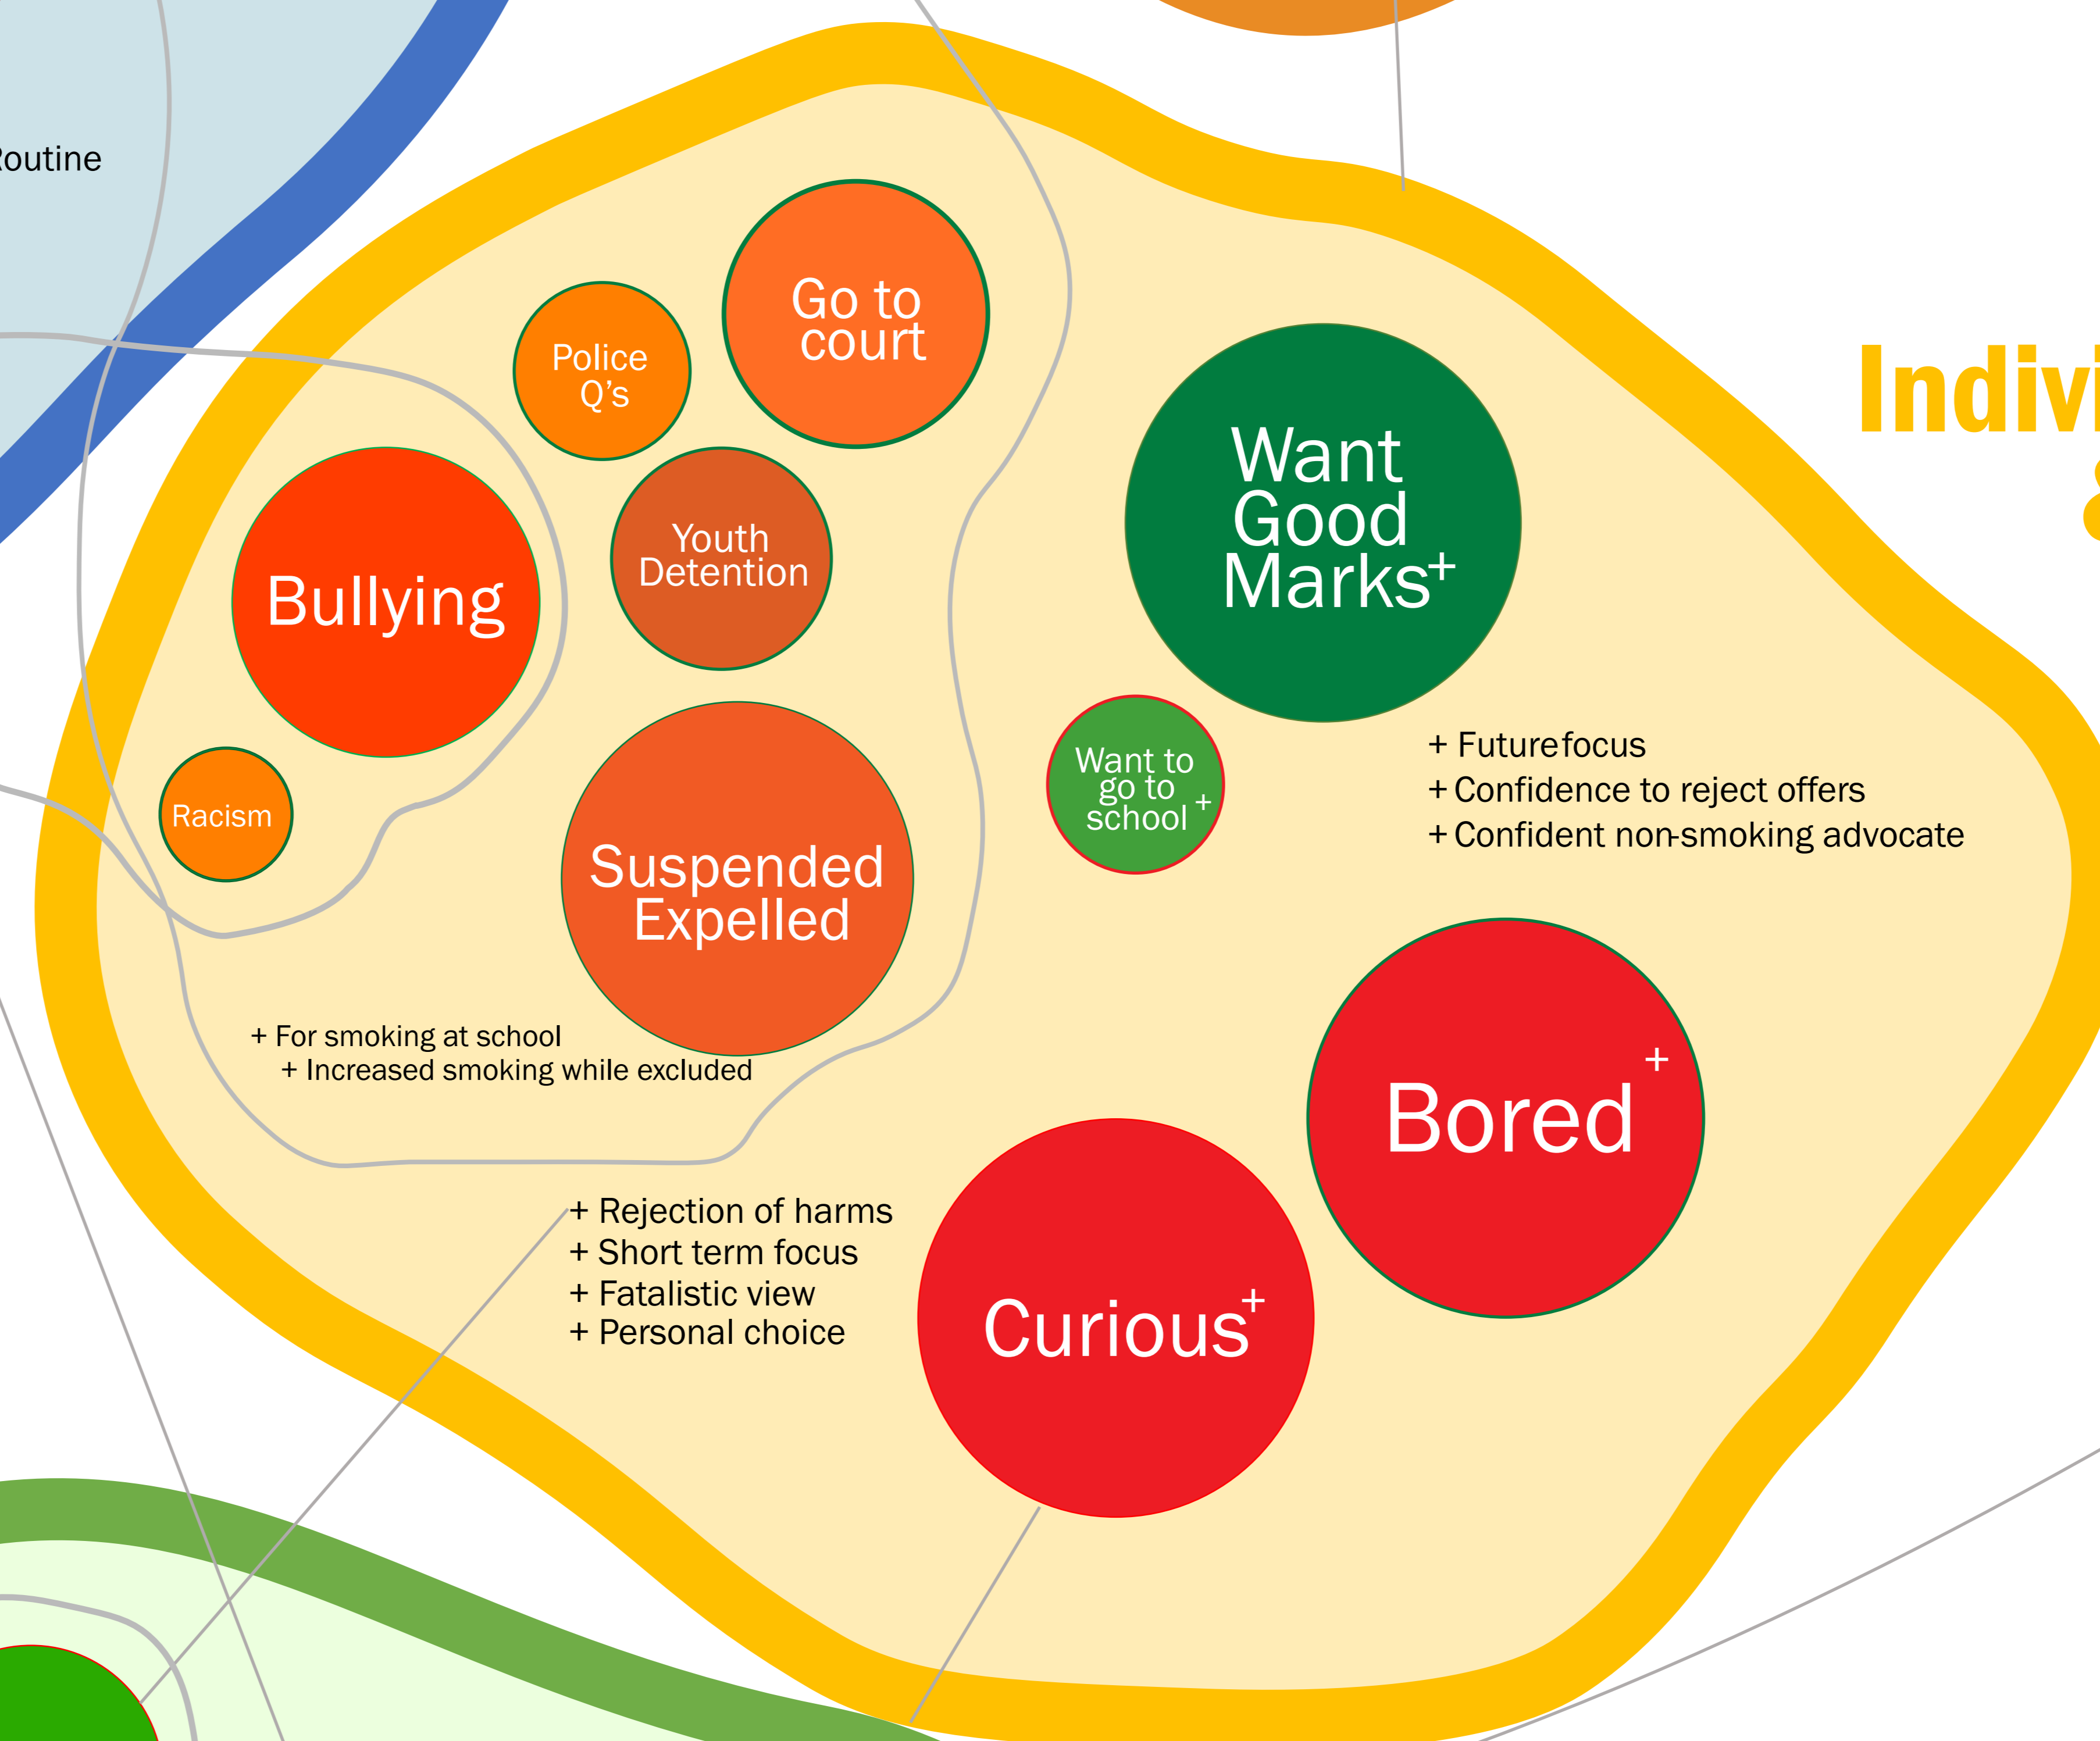

# Influences in the Smoking Environment

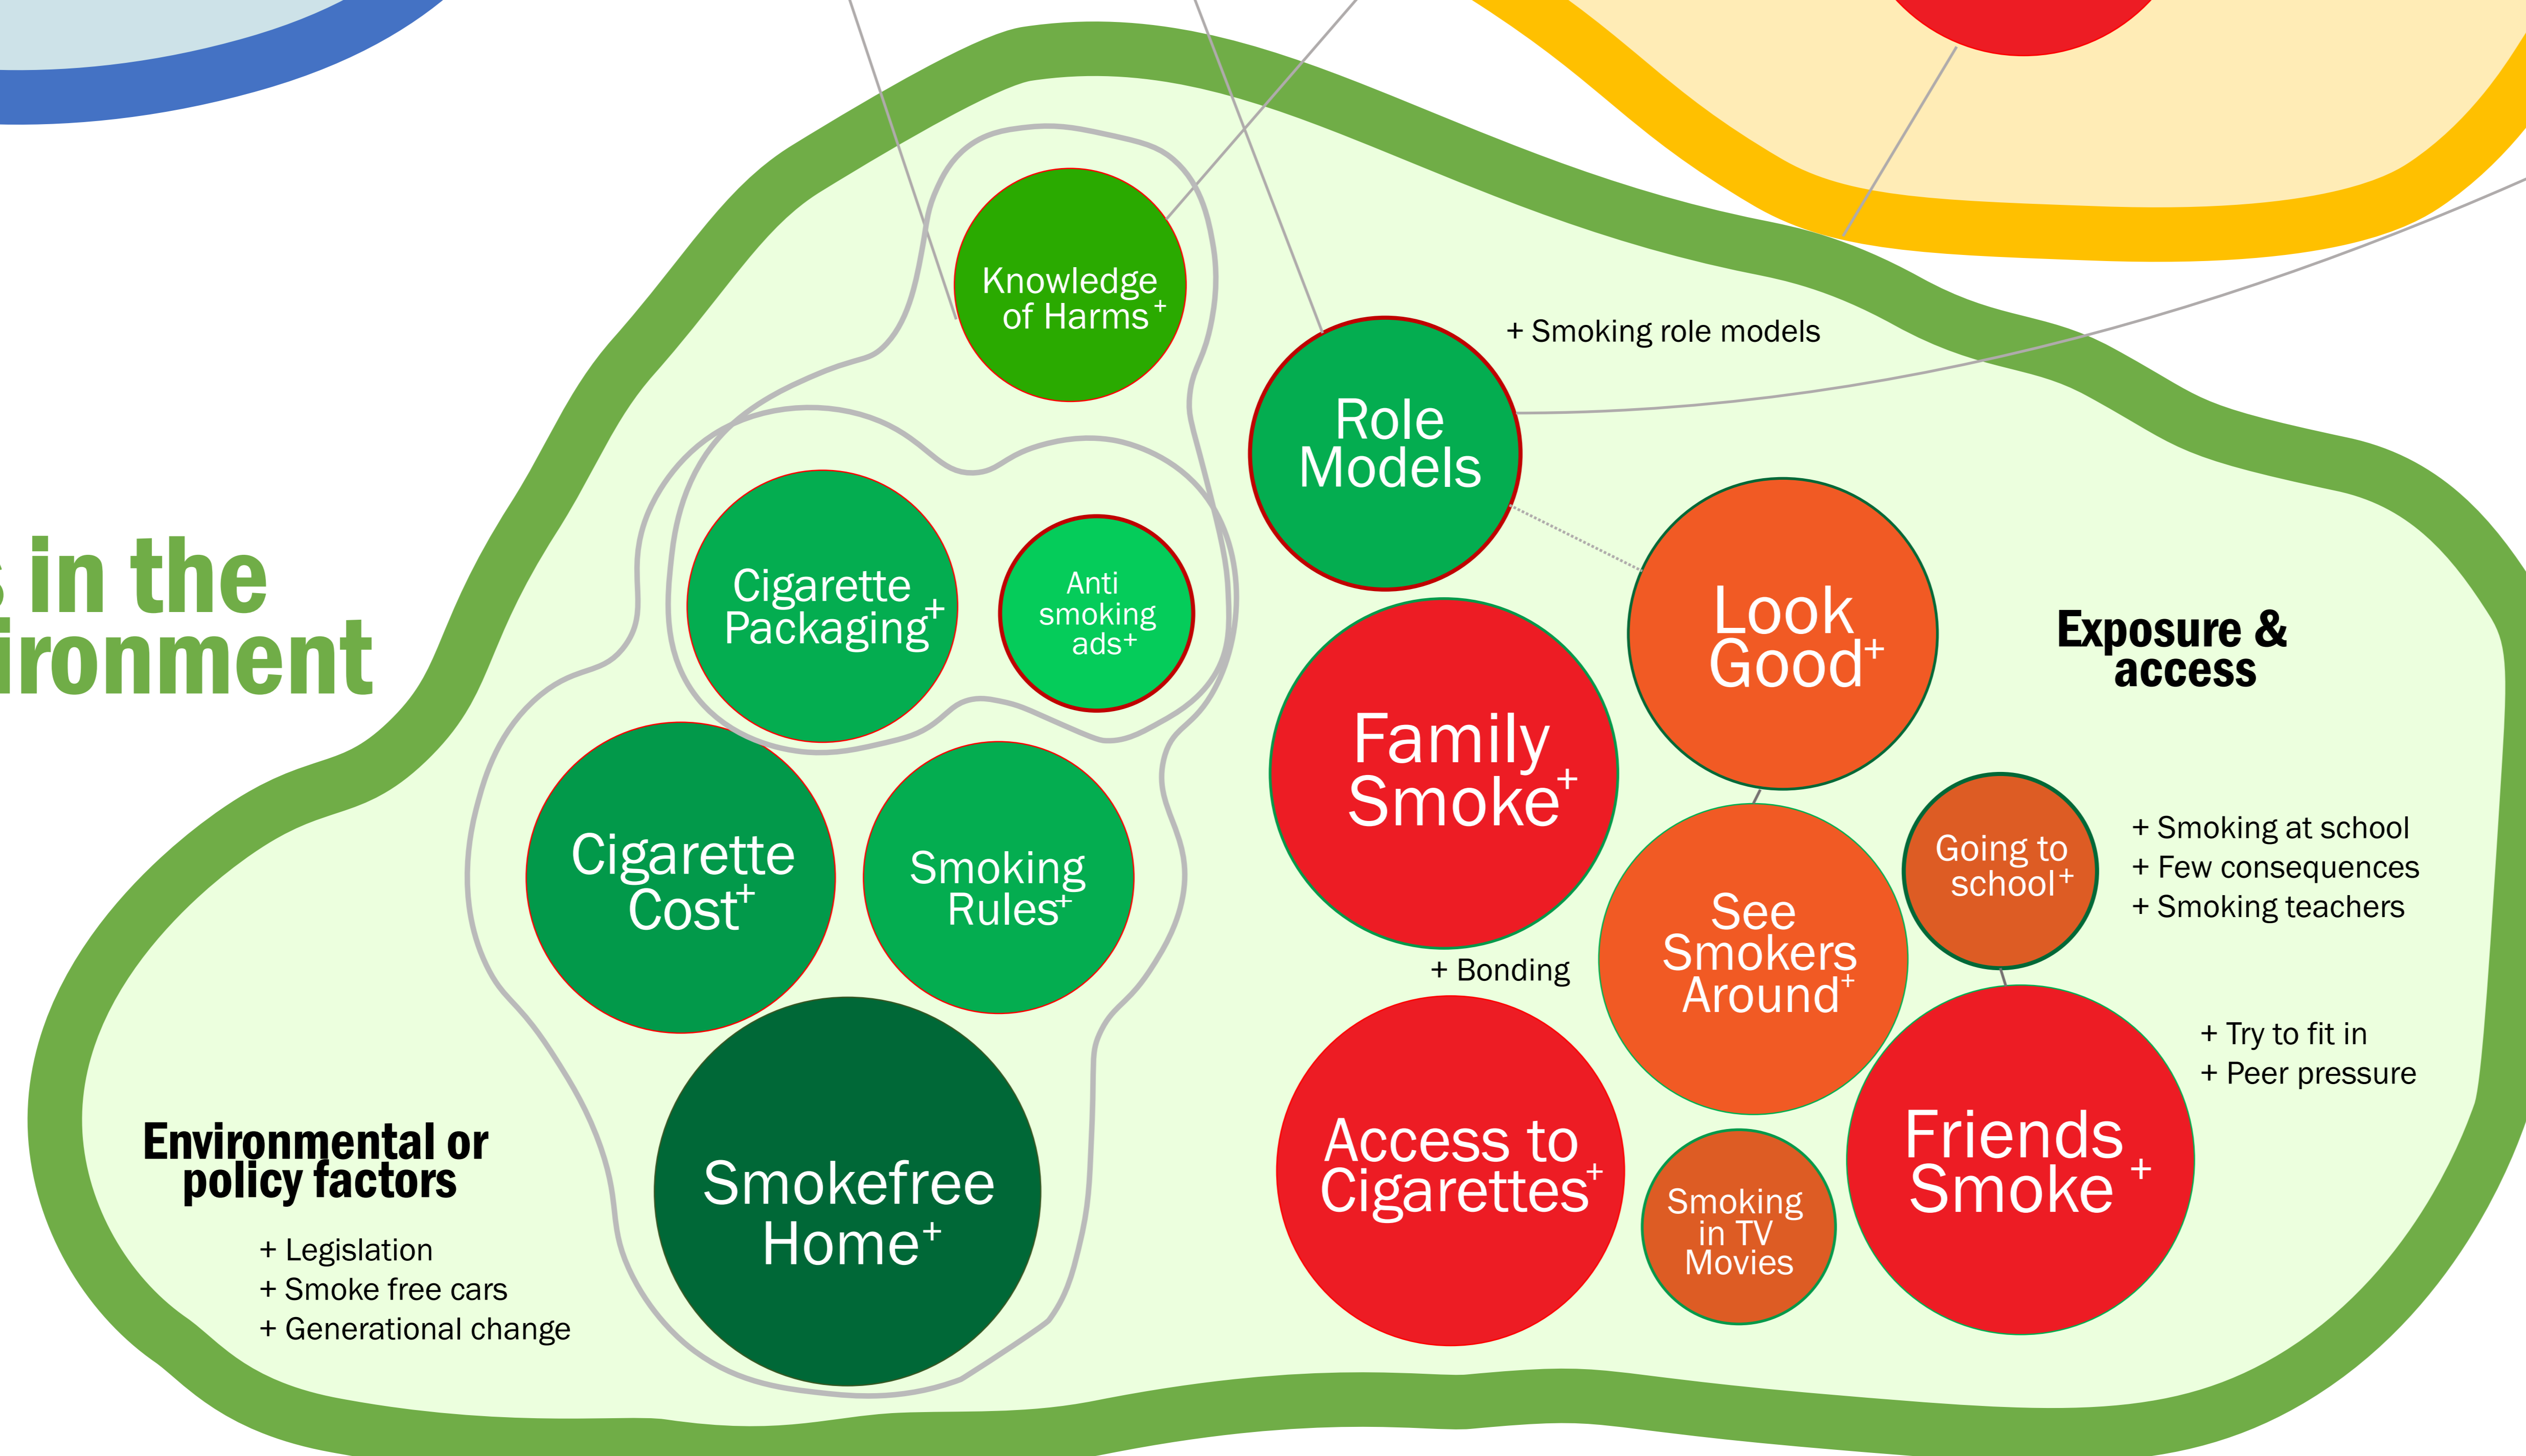

**KEY**

*Relationship (circle fill and line colour):*  
 Non-Smoking Influences  
 Smoking influences  
 Unclear

*Frequency (circle diameter):*  
 Number of groups selected item

**Card Name+**  
 + additional unprompted (no card)

*Categories (lines):*  
 Physical, Social & Emotional Wellbeing  
 Cultural & Community Strengths  
 Individual Empowerment & Engagement  
 Influences in the Smoking Environment
