# Supplementary material for: Don’t Follow the Smoke—Listening to the Tobacco Experiences and Attitudes of Urban Aboriginal Adolescents in the Study of Environment on Aboriginal Resilience and Child Health (SEARCH)
Source: MDPI journal article supplement (doi:10.3390/ijerph20054587), 2023-03-04

Yarndi

Look good

See smokers around

Friendships

Family smokes

Addicted

Curious

Friends smoke

Want good marks

Want to go to school

Smoking on TV/movies

Bored

Sick family

Cigarette packaging

Bullying

Smoke-free home

Fitness

Good mental health

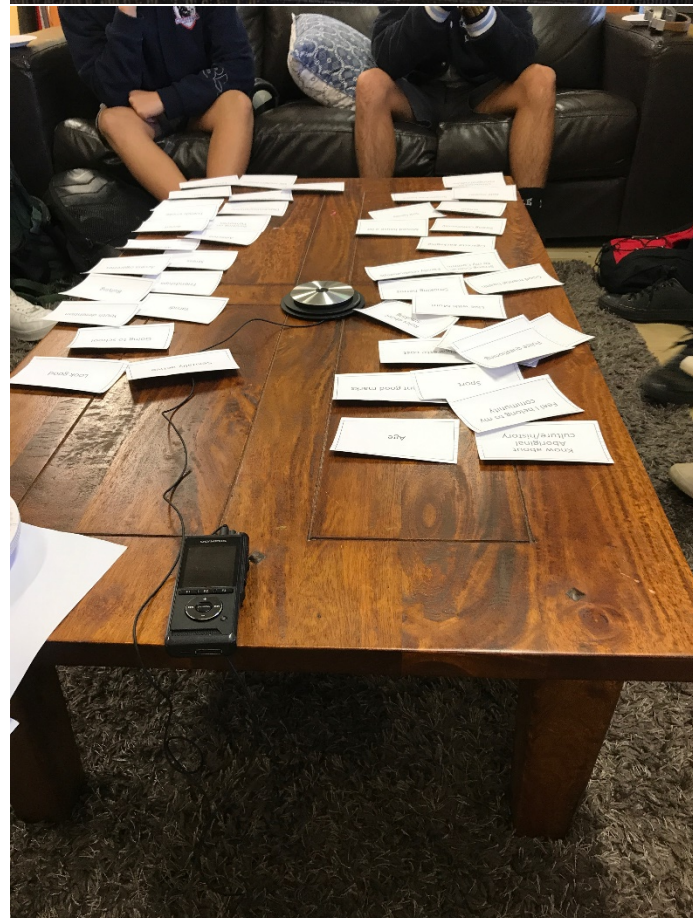

Supplement: s1 [file s1]
