# Supplementary material for: Don’t Follow the Smoke—Listening to the Tobacco Experiences and Attitudes of Urban Aboriginal Adolescents in the Study of Environment on Aboriginal Resilience and Child Health (SEARCH)
Source: MDPI journal article supplement (doi:10.3390/ijerph20054587), 2023-03-04
Supplement: s1 [file s1]

SUPPLEMENTARY FILE S2 – CARD SORT

|                                             |                         |                                                                     |
|---------------------------------------------|-------------------------|---------------------------------------------------------------------|
| Age                                         | Gender                  | Bored                                                               |
| Stress                                      | Fitness                 | Sport                                                               |
| Live with Mum                               | Good mental health      | Depression/anxiety<br><small>Other mental health challenges</small> |
| Bullying                                    | Racism                  | Connected to<br>Aboriginal culture                                  |
| Know about<br>Aboriginal<br>culture/history | Cigarette cost          | Cigarette packaging                                                 |
| Anti-smoking ads                            | Smoking on<br>TV/movies | Alcohol                                                             |

Yarndi

Family smokes

Friends smoke

Role models

Smoke-free home

Sexually active

Going to school

Want good marks

Want to go to  
school

Suspended  
expelled

Moved house a lot

Strong community

Strong Connection  
to my Community

Feel I belong to my  
community

Sick family

Police questioning

Go to court

Youth detention

Addicted

Smoking harms

Curious

Look good

Family relationships

Friendships

Rules about  
smoking

See smokers around

Access cigarettes
