# Supplementary material for: Don’t Follow the Smoke—Listening to the Tobacco Experiences and Attitudes of Urban Aboriginal Adolescents in the Study of Environment on Aboriginal Resilience and Child Health (SEARCH)
Source: MDPI journal article supplement (doi:10.3390/ijerph20054587), 2023-03-04
Supplement: s1 [file s1]

## SUPPLEMENTARY FILE 1.1 – DISCUSSION GUIDE ORIGINAL

- Welcome + reminder of ethics
- Introductions

- What does being “healthy” mean to you? What does it look like?
- What is the opposite?
- What things help or don’t help being healthy?

- Where does smoking fit in that mix?
- What have you seen or heard about smoking?
- How do you think most people your age feel about smoking?
- Would anyone like to share any experiences – your own or friends or family?
- What things do you think might mean someone takes up smoking?
- What things do you think might prompt them to quit?
- What about never taking up smoking at all?

- Card sort activity – things that you think may be important for when or how someone like you might start smoking or not.

- Pull out the three most important things for young people smoking
- Pull out the three most important things for staying a non-smoker
- Tell us a bit about the ones you picked out. Any that were not important at all?

- Here were some things that looked like they might be important for being a non-smoker in the SEARCH survey results – do you agree?

- Good mental health
- Good family relationships (no arguments, live with Mum or Dad)
- Haven’t moved around a lot
- Non-drinkers
- Not sexually active
- Not been in trouble with school (expelled/suspended) – or other family
- Not questioned by police, or had to go to court, or friends in juvenile detention/prison.
- No yarndi use
- School engagement and positive attitudes about going and good marks
- Parents don’t smoke
- Strong sense of community where they live
- More money at home

- Any missing?
- Any that would be more or less important as you get older?

- Thinking about everything we’ve discussed what’s one thing we could do more of to help young people like you grow up as non-smokers?

- Thanks + give out vouchers

## SUPPLEMENTARY FILE S1.2 – FINAL DISCUSSION GUIDE MODIFIED/ADAPTED WITH SITE 2

- Welcome + reminder of ethics
- Introductions

- What does being “healthy” mean to you? What does it look like?
- What is the opposite?
- What things help or don’t help being healthy?

- Where does smoking fit in that mix?
- What have you seen or heard about smoking?
- How do you think most people your age feel about smoking?
- Would anyone like to share any experiences – your own or friends or family?
- What things do you think might mean someone takes up smoking?
- What things do you think might prompt them to quit?
- What about never taking up smoking at all?

- Card sort activity – things that you think may be important for when or how someone like you might start smoking or not.
  - Organise into non-smoking, smoking, unsure/could go both ways
  - Pull out one or more you feel are most important for young people smoking
  - Pull out one or more you feel are most important for young people non-smoking
  - Tell us a bit about the ones you picked out. Any that were not important at all or unsure about or could be both?

- Thinking about everything we’ve discussed what could we could do more of to help young people like you grow up as non-smokers and be healthy in general?
  - What would a program look like or involve?
  - Who would it target? Age/smoking status?
  - How often/long would it run?
  - What sort of activities would you want?

- Thanks + give out vouchers
