# Supplementary material for: Don’t Follow the Smoke—Listening to the Tobacco Experiences and Attitudes of Urban Aboriginal Adolescents in the Study of Environment on Aboriginal Resilience and Child Health (SEARCH)
Source: Int J Environ Res Public Health. 2023 Mar 4;20(5):4587. doi: 10.3390/ijerph20054587 (PMC10002023; doi:10.3390/ijerph20054587)
Supplement: Supplementary file 1 [file ijerph-20-04587-s001.zip]

Archive with 6 entries (6 files):
- S1 Discussion Guide Original and Modified.pdf
- S2 Card Sorting Activity.pdf
- S3 Fieldwork Photos.pdf
- S4 NVivo Coding Structure.pdf
- S5 Extended Participant Quotes.pdf
- S6 Large scale Figure 1 Concept map of card sorting activity.pdf
